# Supplementary material for: High-resolution imaging and analysis of the intestinal bacterial load ofCaenorhabditis elegansduring early adulthood
Source: Royal Society of Chemistry journal article supplement (doi:10.1039/d3ra02934d), 2023-01-01
Supplement: d3ra02934d1.pdf [file d3ra02934d1.pdf]

## Supplementary information

### **High-resolution imaging and analysis of the intestinal bacterial load of *Caenorhabditis elegans* during early adulthood**

**Farzad Rezaeianaran\* and Martin A. M. Gijs**

Laboratory of Microsystems, Ecole Polytechnique Fédérale de Lausanne, CH-1015  
Lausanne, Switzerland.

\*Author to whom correspondence should be addressed

E-mail: [rezaeianaran.farzad@epfl.ch](mailto:rezaeianaran.farzad@epfl.ch)

a)

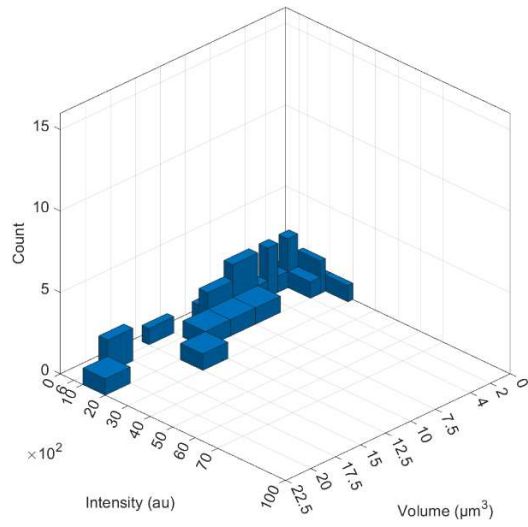

b)

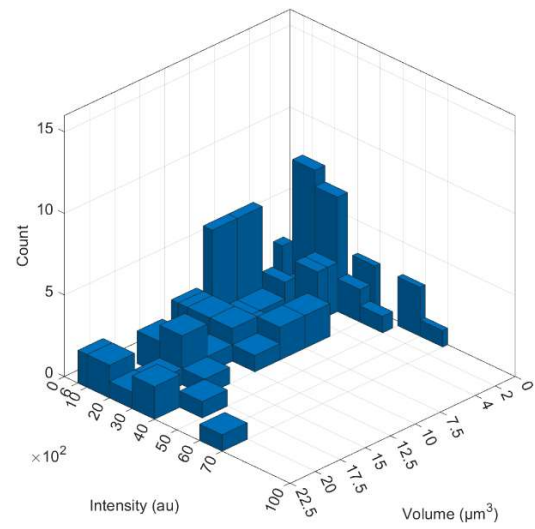

c)

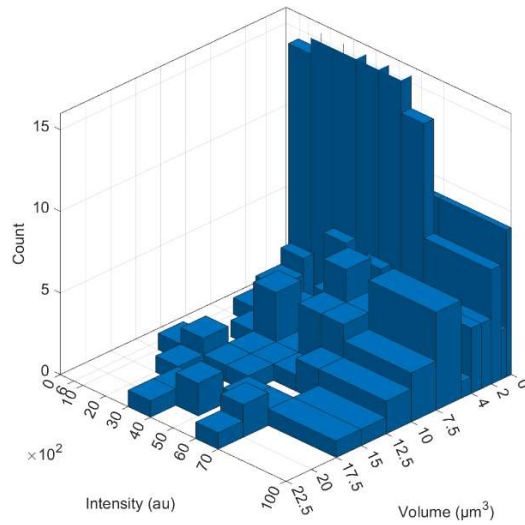

Figure S1- Bivariate histograms of 3 selected worms that have fed on RFP-labelled *E. coli* OP50 for 4 days. The total number of bacterial spots is a) 31, b) 100 and c) 422. The total bacterial load is a)  $2.2042\text{E}+05 \mu\text{m}^3 \cdot \text{au}$  b)  $1.8478\text{E}+06 \mu\text{m}^3 \cdot \text{au}$  and c)  $6.7720\text{E}+06 \mu\text{m}^3 \cdot \text{au}$ .
